# Supplementary material
Source: PubMed Central journal article supplement (PMC8908846)
Supplement: NEJMoa2119497_disclosures.pdf [file NEJMoa2119497_disclosures.pdf]

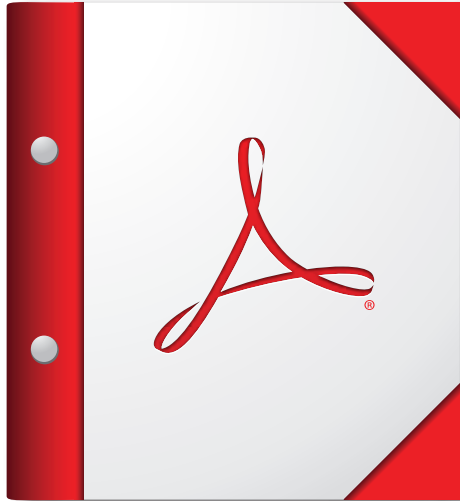

**For the best experience, open this PDF portfolio in  
Acrobat X or Adobe Reader X, or later.**

[Get Adobe Reader Now!](#)
